# Supplementary material for: Randomised controlled trial of WISENSE, a real-time quality improving system for monitoring blind spots during esophagogastroduodenoscopy
Source: PubMed Central journal article supplement — Gut. 2019 Mar 11;68(12):2161–9. doi: 10.1136/gutjnl-2018-317366 (PMC6872441; doi:10.1136/gutjnl-2018-317366), 2019-03-11
Supplement: gutjnl-2018-317366supp001.pdf [file gutjnl-2018-317366supp001.pdf]

Table S1. Sample distribution in different classifications of gastric sites

| Sites                        | number |
|------------------------------|--------|
| 0-NA                         | 1003   |
| 1-esophagus                  | 2373   |
| 2-squamocolumnar junction    | 1597   |
| 3-antrum (G)                 | 1588   |
| 4-antrum (P)                 | 1251   |
| 5-antrum (A)                 | 1148   |
| 6-antrum (L)                 | 1205   |
| 7-duodenal bulb              | 1341   |
| 8-duodenal descending        | 1586   |
| 9-lower body (G)             | 1302   |
| 10-lower body (P)            | 1296   |
| 11-lower body (A)            | 1016   |
| 12-lower body (L)            | 1538   |
| 13-middle-upper body (F) (G) | 2234   |
| 14-middle-upper body (F) (P) | 1283   |
| 15-middle-upper body (F) (A) | 1146   |
| 16-middle-upper body (F) (L) | 1022   |
| 17-fundus (G)                | 2289   |
| 18-fundus (P)                | 1201   |
| 19- fundus (A)               | 1882   |
| 20-fundus (L)                | 1026   |
| 21-middle-upper body (R) (P) | 1123   |
| 22-middle-upper body (R) (A) | 1744   |
| 23-middle-upper body (R) (L) | 1029   |
| 24-incisura (P)              | 1215   |
| 25-incisura (A)              | 1154   |
| 26-incisura (L)              | 1297   |
